# Supplementary material for: Effects of Vendor and Genetic Background on the Composition of the Fecal Microbiota of Inbred Mice
Source: PubMed Central journal article supplement (PMC4326421; doi:10.1371/journal.pone.0116704), 2015-02-12
Supplement: pone.0116704.s004.pdf [file pone.0116704.s004.pdf]

| OTUs with interactions at 10.5 weeks |                      |                                                  | Within A/J             |          |           | Within BALB/c           |          |           | Within C57BL/6             |          |           |
|--------------------------------------|----------------------|--------------------------------------------------|------------------------|----------|-----------|-------------------------|----------|-----------|----------------------------|----------|-----------|
| Phylum                               | Family               | Operational taxonomic unit (OTU)                 | HSD relative to Jax    |          |           | HSD relative to Jax     |          |           | HSD relative to Jax        |          |           |
|                                      |                      |                                                  | logFC                  | P.Value  | adj.P.Val | logFC                   | P.Value  | adj.P.Val | logFC                      | P.Value  | adj.P.Val |
| No BLAST hit                         |                      | No BLAST hit                                     | -0.566766              | 0.173541 | 0.280336  | -0.379747               | 0.212487 | 0.247902  | 0.773826                   | 0.042662 | 0.055994  |
| Actinobacteria                       | Coriobacteriaceae    | family Coriobacteriaceae , unidentified species  | 1.305668               | 0.000102 | 0.000306  | 1.473015                | 4.43E-08 | 9.30E-08  | -0.147255                  | 0.541351 | 0.541351  |
| Bacteroidetes                        | Bacteroidaceae       | Bacteroides acidifaciens                         | 5.46379                | 3.20E-07 | 1.12E-06  | 8.349885                | 6.52E-16 | 3.42E-15  | 6.116469                   | 2.74E-09 | 1.44E-08  |
| Bacteroidetes                        | Bacteroidaceae       | Bacteroides ovatus                               | 5.90384                | 2.61E-10 | 1.82E-09  | 8.327984                | 2.93E-19 | 2.05E-18  | 7.966577                   | 1.97E-15 | 1.38E-14  |
| Bacteroidetes                        | Bacteroidaceae       | Bacteroides uniformis                            | 2.335582               | 0.006532 | 0.015242  | 5.44046                 | 1.99E-11 | 5.96E-11  | 4.716341                   | 7.84E-08 | 2.35E-07  |
| Bacteroidetes                        | [Paraprevotellaceae] | [Prevotella] sp.                                 | 4.16264                | 0.018462 | 0.035245  | -0.276786               | 0.832892 | 0.874537  | -1.437368                  | 0.395479 | 0.415253  |
| Bacteroidetes                        | Porphyromonadaceae   | Parabacteroides distasonis                       | 0.523083               | 0.710359 | 0.785134  | 3.968557                | 0.000258 | 0.000362  | 7.267778                   | 3.70E-07 | 9.72E-07  |
| Bacteroidetes                        | Porphyromonadaceae   | Parabacteroides sp.                              | 0.790337               | 0.348975 | 0.488565  | 2.56724                 | 0.000159 | 0.000238  | 3.999318                   | 5.28E-06 | 1.11E-05  |
| Bacteroidetes                        | Prevotellaceae       | Prevotella sp.                                   | 5.76238                | 6.53E-11 | 6.85E-10  | 8.013503                | 9.13E-20 | 9.59E-19  | 7.637683                   | 6.94E-16 | 7.29E-15  |
| Bacteroidetes                        | Rikenellaceae        | AF12 sp.                                         | 8.792692               | 1.08E-17 | 2.27E-16  | 7.911382                | 3.06E-21 | 6.42E-20  | 6.937052                   | 6.03E-16 | 7.29E-15  |
| Cyanobacteria                        |                      | order YS2, unidentified species                  | 0.89209                | 0.391743 | 0.514162  | 4.571092                | 1.05E-07 | 2.00E-07  | 3.838784                   | 7.38E-05 | 0.000129  |
| Deferribacteres                      | Deferribacteraceae   | Mucispirillum schaedleri                         | 7.897451               | 8.28E-08 | 4.35E-07  | 4.207708                | 2.54E-05 | 4.10E-05  | 5.910917                   | 2.11E-06 | 4.93E-06  |
| Firmicutes                           | Lachnospiraceae      | Blautia sp.                                      | 0.589179               | 0.487119 | 0.601735  | -2.019611               | 0.00355  | 0.004659  | -0.968418                  | 0.22312  | 0.246607  |
| Firmicutes                           | Lachnospiraceae      | Ruminococcus flavefaciens                        | 0.804414               | 0.566813 | 0.661282  | 7.718152                | 6.90E-10 | 1.61E-09  | 4.340522                   | 0.00073  | 0.001179  |
| Firmicutes                           | Lachnospiraceae      | Ruminococcus sp.                                 | -0.218528              | 0.77707  | 0.815923  | -2.727539               | 1.71E-05 | 2.99E-05  | -1.669495                  | 0.020522 | 0.02873   |
| Firmicutes                           | Peptococcaceae       | family Peptococcaceae , unidentified species     | 4.280934               | 1.81E-07 | 7.61E-07  | 4.868318                | 8.61E-12 | 3.62E-11  | 1.916707                   | 0.004483 | 0.006725  |
| Firmicutes                           | Turicibacteraceae    | Turicibacter sp.                                 | 0.140307               | 0.928708 | 0.928708  | 0.019925                | 0.98532  | 0.98532   | -8.773885                  | 2.48E-08 | 8.69E-08  |
| Proteobacteria                       | Alcaligenaceae       | Sutterella sp.                                   | 3.156129               | 0.002144 | 0.00562   | 6.510895                | 1.88E-11 | 5.96E-11  | 6.287102                   | 4.66E-09 | 1.96E-08  |
| Proteobacteria                       |                      | order RF32, unidentified species                 | -3.045722              | 0.017242 | 0.035245  | 2.003449                | 0.022108 | 0.02731   | 1.383108                   | 0.190582 | 0.223246  |
| Proteobacteria                       | Enterobacteriaceae   | family Enterobacteriaceae , unidentified species | 2.061003               | 0.051825 | 0.090694  | 6.50897                 | 1.95E-10 | 5.12E-10  | 1.584003                   | 0.114468 | 0.141401  |
| Proteobacteria                       | Halomonadaceae       | Halomonas sp.                                    | -0.420989              | 0.26841  | 0.402615  | -0.059056               | 0.789753 | 0.872885  | 0.983727                   | 4.18E-05 | 7.97E-05  |
|                                      |                      |                                                  | Within HSD             |          |           |                         |          |           |                            |          |           |
| Phylum                               | Family               | Operational taxonomic unit (OTU)                 | A/J relative to BALB/c |          |           | C57BL/6 relative to A/J |          |           | C57BL/6 relative to BALB/c |          |           |
|                                      |                      |                                                  | logFC                  | P.Value  | adj.P.Val | logFC                   | P.Value  | adj.P.Val | logFC                      | P.Value  | adj.P.Val |
| No BLAST hit                         |                      | No BLAST hit                                     | 0.041995               | 0.873816 | 0.873816  | 0.709054                | 0.011292 | 0.013949  | 0.751048                   | 0.006997 | 0.02449   |
| Actinobacteria                       | Coriobacteriaceae    | family Coriobacteriaceae , unidentified species  | -0.378007              | 0.057715 | 0.0808    | 0.197529                | 0.329819 | 0.34631   | -0.180478                  | 0.36456  | 0.54684   |
| Bacteroidetes                        | Bacteroidaceae       | Bacteroides acidifaciens                         | -1.28123               | 0.032178 | 0.05034   | 1.38133                 | 0.023726 | 0.02768   | 0.1001                     | 0.864399 | 0.908362  |
| Bacteroidetes                        | Bacteroidaceae       | Bacteroides ovatus                               | -1.498758              | 0.002318 | 0.006641  | 1.37357                 | 0.005606 | 0.008409  | -0.125187                  | 0.789313 | 0.908362  |
| Bacteroidetes                        | Bacteroidaceae       | Bacteroides uniformis                            | -0.949086              | 0.084466 | 0.110862  | 1.574577                | 0.006237 | 0.008732  | 0.62549                    | 0.253931 | 0.410196  |
| Bacteroidetes                        | [Paraprevotellaceae] | [Prevotella] sp.                                 | 5.435712               | 2.28E-05 | 0.00012   | -5.637552               | 1.76E-05 | 7.40E-05  | -0.20184                   | 0.865107 | 0.908362  |
| Bacteroidetes                        | Porphyromonadaceae   | Parabacteroides distasonis                       | -2.162666              | 0.018998 | 0.036269  | 6.356682                | 1.49E-08 | 3.14E-07  | 4.194016                   | 2.11E-05 | 0.000148  |
| Bacteroidetes                        | Porphyromonadaceae   | Parabacteroides sp.                              | -0.353038              | 0.520967 | 0.607795  | 3.238531                | 6.93E-07 | 7.27E-06  | 2.885492                   | 4.70E-06 | 6.87E-05  |
| Bacteroidetes                        | Prevotellaceae       | Prevotella sp.                                   | -1.68154               | 0.000367 | 0.00154   | 1.460181                | 0.001942 | 0.003137  | -0.22136                   | 0.615129 | 0.776339  |
| Bacteroidetes                        | Rikenellaceae        | AF12 sp.                                         | 1.032428               | 0.012485 | 0.026219  | -2.098117               | 5.36E-06 | 3.34E-05  | -1.065688                  | 0.010593 | 0.03178   |
| Cyanobacteria                        |                      | order YS2, unidentified species                  | -2.123686              | 0.002454 | 0.006641  | 2.561827                | 0.000498 | 0.000951  | 0.438141                   | 0.49842  | 0.697788  |
| Deferribacteres                      | Deferribacteraceae   | Mucispirillum schaedleri                         | 4.088126               | 5.04E-06 | 3.53E-05  | -2.203998               | 0.008314 | 0.010912  | 1.884129                   | 0.021272 | 0.049634  |
| Firmicutes                           | Lachnospiraceae      | Blautia sp.                                      | 1.286578               | 0.024816 | 0.043428  | -2.509186               | 4.24E-05 | 0.000148  | -1.222608                  | 0.03791  | 0.079611  |
| Firmicutes                           | Lachnospiraceae      | Ruminococcus flavefaciens                        | -7.61288               | 1.34E-10 | 2.81E-09  | 3.561734                | 0.00042  | 0.000951  | -4.051146                  | 3.10E-05 | 0.000163  |
| Firmicutes                           | Lachnospiraceae      | Ruminococcus sp.                                 | 1.458683               | 0.005002 | 0.011672  | -2.045531               | 0.000196 | 0.000515  | -0.586848                  | 0.243424 | 0.410196  |
| Firmicutes                           | Peptococcaceae       | family Peptococcaceae , unidentified species     | -0.413669              | 0.382314 | 0.47227   | -2.012945               | 0.000129 | 0.000388  | -2.426615                  | 6.54E-06 | 6.87E-05  |
| Firmicutes                           | Turicibacteraceae    | Turicibacter sp.                                 | 0.408807               | 0.669177 | 0.702635  | -0.358565               | 0.715983 | 0.715983  | 0.050243                   | 0.95741  | 0.95741   |
| Proteobacteria                       | Alcaligenaceae       | Sutterella sp.                                   | -1.994602              | 0.00253  | 0.006641  | 2.299499                | 0.000746 | 0.001306  | 0.304897                   | 0.628465 | 0.776339  |
| Proteobacteria                       |                      | order RF32, unidentified species                 | -1.751296              | 0.03356  | 0.05034   | 4.250754                | 6.37E-06 | 3.34E-05  | 2.499458                   | 0.002085 | 0.008757  |
| Proteobacteria                       | Enterobacteriaceae   | family Enterobacteriaceae , unidentified species | -4.421983              | 1.30E-07 | 1.37E-06  | 2.687273                | 0.000488 | 0.000951  | -1.734711                  | 0.018304 | 0.084049  |
| Proteobacteria                       | Halomonadaceae       | Halomonas sp.                                    | -0.128392              | 0.565955 | 0.625529  | 0.349622                | 0.181699 | 0.200825  | 0.22123                    | 0.239501 | 0.410196  |
|                                      |                      |                                                  | Within Jax             |          |           |                         |          |           |                            |          |           |
| Phylum                               | Family               | Operational taxonomic unit (OTU)                 | A/J relative to BALB/c |          |           | C57BL/6 relative to A/J |          |           | C57BL/6 relative to BALB/c |          |           |
|                                      |                      |                                                  | logFC                  | P.Value  | adj.P.Val | logFC                   | P.Value  | adj.P.Val | logFC                      | P.Value  | adj.P.Val |
| No BLAST hit                         |                      | No BLAST hit                                     | 0.229014               | 0.454551 | 0.650062  | -0.631539               | 0.025019 | 0.105078  | -0.402525                  | 0.196309 | 0.34354   |
| Actinobacteria                       | Coriobacteriaceae    | family Coriobacteriaceae , unidentified species  | -0.21066               | 0.359798 | 0.581212  | 1.650452                | 1.30E-10 | 1.36E-09  | 1.439792                   | 1.56E-07 | 1.64E-06  |
| Bacteroidetes                        | Bacteroidaceae       | Bacteroides acidifaciens                         | 1.604865               | 0.020689 | 0.144822  | 0.728651                | 0.229653 | 0.475958  | 2.333515                   | 0.001254 | 0.004388  |
| Bacteroidetes                        | Bacteroidaceae       | Bacteroides ovatus                               | 0.925386               | 0.089505 | 0.208845  | -0.689167               | 0.158674 | 0.475958  | 0.236219                   | 0.663286 | 0.773834  |
| Bacteroidetes                        | Bacteroidaceae       | Bacteroides uniformis                            | 2.155792               | 0.005423 | 0.05694   | -0.806182               | 0.231457 | 0.475958  | 1.34961                    | 0.073083 | 0.153475  |
| Bacteroidetes                        | [Paraprevotellaceae] | [Prevotella] sp.                                 | 0.996286               | 0.486149 | 0.650062  | -0.037544               | 0.976895 | 0.97963   | 0.958742                   | 0.507255 | 0.640383  |
| Bacteroidetes                        | Porphyromonadaceae   | Parabacteroides distasonis                       | 1.282808               | 0.204791 | 0.390965  | -0.38802                | 0.679989 | 0.892486  | 0.894788                   | 0.379986 | 0.599166  |
| Bacteroidetes                        | Porphyromonadaceae   | Parabacteroides sp.                              | 1.423865               | 0.03157  | 0.16574   | 0.029549                | 0.959604 | 0.97963   | 1.453414                   | 0.030535 | 0.071248  |
| Bacteroidetes                        | Prevotellaceae       | Prevotella sp.                                   | 0.569583               | 0.271675 | 0.475431  | -0.415123               | 0.380873 | 0.666527  | 0.15446                    | 0.766965 | 0.847698  |
| Bacteroidetes                        | Rikenellaceae        | AF12 sp.                                         | 0.151118               | 0.765286 | 0.824701  | -0.242476               | 0.572969 | 0.832026  | -0.091358                  | 0.856469 | 0.856469  |
| Cyanobacteria                        |                      | order YS2, unidentified species                  | 1.555317               | 0.056551 | 0.169654  | -0.384867               | 0.594304 | 0.832026  | 1.17045                    | 0.150849 | 0.287984  |
| Deferribacteres                      | Deferribacteraceae   | Mucispirillum schaedleri                         | 0.398384               | 0.664458 | 0.820801  | -0.217464               | 0.801518 | 0.97963   | 0.18092                    | 0.845401 | 0.856469  |
| Firmicutes                           | Lachnospiraceae      | Blautia sp.                                      | -1.322212              | 0.046753 | 0.169654  | -0.951589               | 0.096274 | 0.336957  | -2.273802                  | 0.001086 | 0.004388  |
| Firmicutes                           | Lachnospiraceae      | Ruminococcus flavefaciens                        | -0.699142              | 0.495286 | 0.650062  | 0.025626                | 0.97963  | 0.97963   | -0.673516                  | 0.518406 | 0.640383  |
| Firmicutes                           | Lachnospiraceae      | Ruminococcus sp.                                 | -1.050328              | 0.071632 | 0.188033  | -0.594565               | 0.249311 | 0.475958  | -1.644893                  | 0.006499 | 0.017059  |
| Firmicutes                           | Peptococcaceae       | family Peptococcaceae , unidentified species     | 0.173715               | 0.776443 | 0.824701  | 0.351282                | 0.548006 | 0.832026  | 0.524996                   | 0.399444 | 0.599166  |
| Firmicutes                           | Turicibacteraceae    | Turicibacter sp.                                 | 0.288426               | 0.785429 | 0.824701  | 8.555627                | 2.27E-12 | 4.76E-11  | 8.844053                   | 1.76E-10 | 3.70E-09  |
| Proteobacteria                       | Alcaligenaceae       | Sutterella sp.                                   | 1.360164               | 0.055599 | 0.169654  | -0.831474               | 0.229419 | 0.475958  | 0.52869                    | 0.457665 | 0.640383  |
| Proteobacteria                       |                      | order RF32, unidentified species                 | 3.297874               | 0.001656 | 0.032827  | -0.178076               | 0.84247  | 0.97963   | 3.119799                   | 0.002904 | 0.008711  |
| Proteobacteria                       | Enterobacteriaceae   | family Enterobacteriaceae , unidentified species | 0.025984               | 0.976756 | 0.976756  | 3.164272                | 0.000349 | 0.001831  | 3.190256                   | 0.000993 | 0.004388  |
| Proteobacteria                       | Halomonadaceae       | Halomonas sp.                                    | 0.233541               | 0.200125 | 0.390965  | -1.055093               | 1.98E-07 | 1.39E-06  | -0.821553                  | 5.06E-05 | 0.000354  |

Table S4
