# Supplementary material for: Effects of Vendor and Genetic Background on the Composition of the Fecal Microbiota of Inbred Mice
Source: PLOS journal article supplement (doi:10.1371/journal.pone.0116704), 2015-02-12
Supplement: S5 (10.1371/journal.pone.0116704.s005) [file journal.pone.0116704.s005]

| Phyla without vendor × strain interactions at 3.5 weeks |  |  | Main Effects - Vendor (Jax relative to HSD) |          |          |          |           |          | Main Effects - Strain |          |           | A/J relative to BALB/c |          |           | C57BL/6 relative to A/J |          |           | C57BL/6 relative to BALB/c |          |           |
|---------------------------------------------------------|--|--|---------------------------------------------|----------|----------|----------|-----------|----------|-----------------------|----------|-----------|------------------------|----------|-----------|-------------------------|----------|-----------|----------------------------|----------|-----------|
| Phylum                                                  |  |  | logFC                                       | AveExpr  | t        | P.Value  | adj.P.Val | B        | F                     | P.Value  | adj.P.Val | logFC                  | P.Value  | adj.P.Val | logFC                   | P.Value  | adj.P.Val | logFC                      | P.Value  | adj.P.Val |
| Actinobacteria                                          |  |  | -0.12098                                    | 4.072324 | -0.18661 | 0.852772 | 0.852772  | -6.57223 | 2.752666              | 0.07412  | 0.444722  | -0.82841               | 0.116497 | 0.450108  | 2.173125                | 2.11E-05 | 0.000127  | 1.344712                   | 0.011646 | 0.069876  |
| Bacteroidetes                                           |  |  | -0.52225                                    | 14.85796 | -1.15037 | 0.255852 | 0.511703  | -5.97738 | 0.887856              | 0.418372 | 0.998528  | -0.27687               | 0.450108 | 0.450108  | 0.090781                | 0.773842 | 0.84045   | -0.18609                   | 0.611056 | 0.785559  |
| Cyanobacteria                                           |  |  | -0.41212                                    | 3.587458 | -0.61543 | 0.541263 | 0.649516  | -6.41005 | 0.120892              | 0.886406 | 0.998528  | 0.569389               | 0.31465  | 0.450108  | -0.44169                | 0.421362 | 0.84045   | 0.127697                   | 0.833767 | 0.833767  |
| Firmicutes                                              |  |  | -0.29815                                    | 16.13947 | -0.68943 | 0.493963 | 0.649516  | -6.39494 | 0.074317              | 0.928487 | 0.998528  | -0.27312               | 0.436325 | 0.450108  | 0.116533                | 0.699972 | 0.84045   | -0.15658                   | 0.654632 | 0.785559  |
| Tenericutes                                             |  |  | 1.361922                                    | 9.04063  | 2.34328  | 0.023428 | 0.070284  | -4.02872 | 0.001473              | 0.998528 | 0.998528  | 0.349172               | 0.448944 | 0.450108  | -1.10096                | 0.007548 | 0.022643  | -0.75179                   | 0.106554 | 0.319662  |
| TM7                                                     |  |  | -2.48252                                    | 2.401074 | -3.51868 | 0.000979 | 0.005874  | -0.98322 | 0.16926               | 0.844805 | 0.998528  | -0.68753               | 0.219351 | 0.450108  | 0.101043                | 0.84045  | 0.84045   | -0.58649                   | 0.284373 | 0.568745  |

  

| OTUs without vendor × strain interactions at 3.5 weeks |                      |                                                   | Main Effects - Vendor (Jax relative to HSD) |          |          |          |           |          | Main Effects - Strain |          |           | A/J relative to BALB/c |          |           | C57BL/6 relative to A/J |          |           | C57BL/6 relative to BALB/c |          |           |
|--------------------------------------------------------|----------------------|---------------------------------------------------|---------------------------------------------|----------|----------|----------|-----------|----------|-----------------------|----------|-----------|------------------------|----------|-----------|-------------------------|----------|-----------|----------------------------|----------|-----------|
| Phylum                                                 | Family               | Operational taxonomic unit (OTU)                  | logFC                                       | AveExpr  | t        | P.Value  | adj.P.Val | B        | F                     | P.Value  | adj.P.Val | logFC                  | P.Value  | adj.P.Val | logFC                   | P.Value  | adj.P.Val | logFC                      | P.Value  | adj.P.Val |
| No BLAST hit                                           |                      | No BLAST hit                                      | -1.64009                                    | 1.594889 | -1.91699 | 0.062467 | 0.098162  | -4.23344 | 7.751032              | 0.001442 | 0.012685  | -0.77052               | 0.219696 | 0.634229  | 0.52583                 | 0.355407 | 0.600857  | -0.24469                   | 0.707226 | 0.946865  |
| Actinobacteria                                         | Coriobacteriaceae    | Adlercreutzia sp.                                 | 0.586012                                    | 3.129167 | 0.789551 | 0.434487 | 0.525521  | -5.97365 | 0.708507              | 0.498507 | 0.722658  | 0.808598               | 0.154437 | 0.554552  | -0.89308                | 0.082587 | 0.302817  | -0.08448                   | 0.882306 | 0.946865  |
| Bacteroidetes                                          | [Odoribacteraceae]   | Odoribacter sp.                                   | -5.92579                                    | 3.879872 | -3.41168 | 0.001499 | 0.00347   | -1.23138 | 0.20838               | 0.812782 | 0.927796  | -0.63208               | 0.617155 | 0.805315  | 0.164443                | 0.893705 | 0.893705  | -0.46763                   | 0.738023 | 0.946865  |
| Bacteroidetes                                          | Bacteroidaceae       | Bacteroides acidifaciens                          | -7.92188                                    | 0.839285 | -9.04394 | 3.50E-11 | 7.71E-10  | 15.16478 | 1.786562              | 0.180762 | 0.361523  | -0.45623               | 0.42518  | 0.805315  | 0.386035                | 0.459283 | 0.661466  | -0.0702                    | 0.906549 | 0.949718  |
| Bacteroidetes                                          | Bacteroidaceae       | Bacteroides ovatus                                | -4.79265                                    | 3.81991  | -5.61742 | 1.67E-06 | 1.47E-05  | 4.931255 | 8.506237              | 0.000844 | 0.012375  | -1.19906               | 0.020464 | 0.261201  | -0.52228                | 0.309037 | 0.570608  | -1.72134                   | 0.004665 | 0.051311  |
| Bacteroidetes                                          | Bacteroidaceae       | Bacteroides uniformis                             | -4.90963                                    | 3.444278 | -3.91537 | 0.000346 | 0.001088  | 0.177294 | 0.532411              | 0.591327 | 0.765247  | -0.58985               | 0.439705 | 0.805315  | -0.41524                | 0.566652 | 0.692574  | -1.00509                   | 0.224513 | 0.757549  |
| Bacteroidetes                                          | Bacteroidaceae       | Bacteroides sp.                                   | -7.76009                                    | 6.441957 | -10.237  | 1.09E-12 | 4.78E-11  | 18.30429 | 0.113104              | 0.893345 | 0.942794  | 0.330794               | 0.51522  | 0.805315  | -0.7316                 | 0.131974 | 0.446682  | -0.40081                   | 0.465837 | 0.854035  |
| Bacteroidetes                                          | Porphyromonadaceae   | Parabacteroides distasonis                        | -6.18166                                    | 4.136032 | -5.03371 | 1.09E-05 | 5.97E-05  | 3.31329  | 5.540816              | 0.007552 | 0.03323   | 0.153118               | 0.846037 | 0.900486  | 0.868729                | 0.233433 | 0.553009  | 0.1021847                  | 0.21744  | 0.757549  |
| Bacteroidetes                                          | Porphyromonadaceae   | Parabacteroides sp.                               | -3.8426                                     | 2.793971 | -2.7885  | 0.00815  | 0.017929  | -2.59775 | 1.190994              | 0.826893 | 0.927796  | 0.255265               | 0.725402 | 0.870654  | -0.41396                | 0.548583 | 0.692574  | -0.15869                   | 0.839811 | 0.946865  |
| Bacteroidetes                                          | Prevotellaceae       | Prevotella sp.                                    | -4.67126                                    | 3.918466 | -5.91691 | 6.38E-07 | 7.02E-06  | 5.912902 | 6.114045              | 0.004849 | 0.025147  | -0.98824               | 0.06498  | 0.345834  | 0.32244                 | 0.517019 | 0.689358  | -0.6658                    | 0.241038 | 0.757549  |
| Bacteroidetes                                          | Rikenellaceae        | AF12 sp.                                          | -5.43277                                    | 4.011584 | -5.32056 | 4.34E-06 | 2.73E-05  | 4.171968 | 3.116626              | 0.055322 | 0.128115  | -0.79337               | 0.278208 | 0.720069  | -0.70697                | 0.322487 | 0.570608  | -1.50034                   | 0.06745  | 0.370974  |
| Bacteroidetes                                          | Rikenellaceae        | family Rikenellaceae , unidentified species       | 2.151736                                    | 10.84666 | 1.004783 | 0.321096 | 0.415535  | -5.8424  | 0.64083               | 0.532225 | 0.722658  | -1.72442               | 0.241069 | 0.634229  | -1.39775                | 0.268689 | 0.570608  | -3.12218                   | 0.035239 | 0.258419  |
| Cyanobacteria                                          |                      | order Streptophyta , unidentified species         | -1.87075                                    | 2.82565  | -2.0952  | 0.042589 | 0.069405  | -0.03345 | 7.084221              | 0.002342 | 0.015611  | -0.92802               | 0.070739 | 0.345834  | -1.36488                | 0.008532 | 0.062569  | -2.2929                    | 0.000203 | 0.00892   |
| Cyanobacteria                                          |                      | order YS2 , unidentified species                  | -2.89275                                    | 1.82488  | -2.09685 | 0.042434 | 0.069405  | -8.38695 | 4.633452              | 0.015549 | 0.054876  | -1.37824               | 0.114957 | 0.459826  | 0.80026                 | 0.307617 | 0.570608  | -0.57798                   | 0.520177 | 0.8803    |
| Firmicutes                                             | [Mogibacteriaceae]   | family [Mogibacteriaceae] , unidentified species  | 3.909356                                    | 5.39149  | 4.938844 | 1.47E-05 | 7.15E-05  | 3.027059 | 0.622064              | 0.541993 | 0.722658  | 0.150016               | 0.771716 | 0.870654  | -0.60429                | 0.204444 | 0.553009  | -0.45427                   | 0.404193 | 0.822992  |
| Firmicutes                                             | Christensenellaceae  | family Christensenellaceae , unidentified species | -4.17007                                    | 1.684894 | -3.48872 | 0.001204 | 0.002943  | -0.91534 | 0.635703              | 0.534876 | 0.722658  | 0.560764               | 0.496558 | 0.805315  | -0.30377                | 0.676918 | 0.726449  | 0.256993                   | 0.760432 | 0.946865  |
| Firmicutes                                             | Clostridiaceae       | Candidatus Arthromitus                            | -5.41621                                    | 3.341778 | -7.47198 | 4.40E-09 | 6.45E-08  | 10.1647  | 4.425457              | 0.018417 | 0.054876  | -0.82545               | 0.08273  | 0.364012  | 0.432223                | 0.306455 | 0.570608  | -0.39322                   | 0.411496 | 0.822992  |
| Firmicutes                                             | Clostridiaceae       | Clostridium sp.                                   | 6.285013                                    | 3.531087 | 4.836592 | 2.03E-05 | 8.11E-05  | 2.743045 | 0.937226              | 0.026748 | 0.06923   | -0.54363               | 0.517    | 0.805315  | 1.390944                | 0.059801 | 0.29236   | 0.847314                   | 0.305254 | 0.769782  |
| Firmicutes                                             | Clostridiaceae       | family Clostridiaceae , unidentified species      | 2.748873                                    | 4.125705 | 2.426348 | 0.019896 | 0.038062  | -3.462   | 9.870261              | 0.000332 | 0.007308  | -0.20593               | 0.004173 | 0.091803  | 2.051067                | 0.00159  | 0.017493  | -0.00796                   | 0.99103  | 0.99103   |
| Firmicutes                                             |                      | order Clostridiales , unidentified species        | 0.918824                                    | 14.60765 | 1.435445 | 0.159005 | 0.225684  | -5.34024 | 0.082066              | 0.921367 | 0.942794  | 0.240219               | 0.570095 | 0.805315  | -0.45759                | 0.238799 | 0.553009  | -0.21737                   | 0.624129 | 0.946865  |
| Firmicutes                                             | Dehalobacteriaceae   | Dehalobacterium sp.                               | -0.51987                                    | 5.767456 | -0.717   | 0.47758  | 0.552987  | -0.08384 | 0.102159              | 0.903123 | 0.942794  | -0.13856               | 0.770683 | 0.870654  | -0.15791                | 0.715851 | 0.749939  | -0.29648                   | 0.552909 | 0.890491  |
| Firmicutes                                             | Erysipelotrichaceae  | Coprocalillus sp.                                 | 1.123162                                    | 2.324698 | 1.224383 | 0.228035 | 0.313548  | -5.7795  | 1.821255              | 0.175104 | 0.361523  | 0.793837               | 0.230629 | 0.634229  | -0.35102                | 0.551585 | 0.692574  | 0.442822                   | 0.515428 | 0.8803    |
| Firmicutes                                             | Erysipelotrichaceae  | family Erysipelotrichaceae , unidentified species | 2.689451                                    | 0.695033 | 3.752933 | 0.00056  | 0.001643  | -0.37959 | 1.909016              | 0.161607 | 0.355536  | -0.08176               | 0.863614 | 0.900486  | -1.55269                | 0.000752 | 0.013934  | -1.63444                   | 0.001872 | 0.027457  |
| Firmicutes                                             | Lachnospiraceae      | Anaerostipes sp.                                  | 3.972292                                    | 6.517977 | 2.274632 | 0.028414 | 0.052093  | -3.8991  | 0.044799              | 0.956238 | 0.956238  | -0.9321                | 0.415074 | 0.805315  | 0.988132                | 0.324209 | 0.570608  | 0.056033                   | 0.961466 | 0.983826  |
| Firmicutes                                             | Lachnospiraceae      | Blautia sp.                                       | -0.48128                                    | 2.151563 | -0.38812 | 0.700007 | 0.770008  | -6.08174 | 4.715891              | 0.014545 | 0.054876  | 1.279628               | 0.163845 | 0.554552  | -1.50303                | 0.078359 | 0.302817  | -0.2234                    | 0.816756 | 0.946865  |
| Firmicutes                                             | Lachnospiraceae      | Coproccoccus sp.                                  | 2.058689                                    | 7.450378 | 2.444518 | 0.019049 | 0.038062  | -3.5781  | 0.238697              | 0.788778 | 0.927796  | 0.288562               | 0.599514 | 0.805315  | -1.14636                | 0.026341 | 0.144875  | -0.8578                    | 0.141461 | 0.691586  |
| Firmicutes                                             | Lachnospiraceae      | Dorea sp.                                         | -0.11312                                    | 3.766836 | -0.12388 | 0.902033 | 0.902033  | -6.29312 | 0.201795              | 0.818097 | 0.927796  | 1.433616               | 0.023746 | 0.261201  | -0.75397                | 0.20468  | 0.553009  | 0.679649                   | 0.314911 | 0.769782  |
| Firmicutes                                             | Lachnospiraceae      | Roseburia sp.                                     | -2.4188                                     | 0.741497 | -1.76561 | 0.085163 | 0.129212  | -4.46206 | 3.670497              | 0.034476 | 0.084274  | 2.086474               | 0.044399 | 0.325589  | -1.26248                | 0.171792 | 0.539919  | 0.823995                   | 0.434412 | 0.83105   |
| Firmicutes                                             | Lachnospiraceae      | Ruminococcus gnavus                               | 0.884545                                    | 7.583041 | 1.049219 | 0.300433 | 0.400577  | -5.79826 | 4.406305              | 0.018708 | 0.054876  | 0.56721                | 0.304812 | 0.745096  | -1.77379                | 0.00095  | 0.013934  | -1.20658                   | 0.041305 | 0.25963   |
| Firmicutes                                             | Lachnospiraceae      | family Lachnospiraceae , unidentified species     | 1.614003                                    | 12.11702 | 2.122948 | 0.040054 | 0.069405  | -4.22015 | 1.154585              | 0.32556  | 0.530543  | -0.07505               | 0.880021 | 0.900486  | -1.32024                | 0.00554  | 0.048751  | -1.3953                    | 0.102623 | 0.090317  |
| Firmicutes                                             | Peptococcaceae       | family Peptococcaceae , unidentified species      | -4.05961                                    | 1.632833 | -4.41995 | 7.46E-05 | 0.000274  | 1.538151 | 0.750694              | 0.47863  | 0.722658  | 0.369021               | 0.531749 | 0.805315  | -0.26413                | 0.624909 | 0.707985  | 0.104891                   | 0.864374 | 0.946865  |
| Firmicutes                                             | Ruminococcaceae      | Anaerotruncus sp.                                 | -0.35288                                    | 0.605095 | -0.50854 | 0.613895 | 0.6926    | -5.88874 | 8.096679              | 0.001126 | 0.012387  | 2.160099               | 0.0013   | 0.057207  | -0.2085                 | 0.000923 | 0.013934  | 0.131601                   | 0.840884 | 0.946865  |
| Firmicutes                                             | Ruminococcaceae      | Oscillospira sp.                                  | 0.597043                                    | 11.79442 | 0.776752 | 0.441916 | 0.525521  | -6.04012 | 0.170986              | 0.843451 | 0.927796  | -0.3413                | 0.498157 | 0.805315  | -0.38199                | 0.406629 | 0.638989  | -0.72329                   | 0.174947 | 0.736356  |
| Firmicutes                                             | Ruminococcaceae      | Ruminococcus sp.                                  | 0.828589                                    | 9.776695 | 0.823007 | 0.415428 | 0.522252  | -6.00395 | 1.161327              | 0.323493 | 0.530543  | -0.61012               | 0.352311 | 0.805315  | -0.30921                | 0.604041 | 0.707985  | -0.91933                   | 0.184089 | 0.736356  |
| Firmicutes                                             | Ruminococcaceae      | family Ruminococcaceae , unidentified species     | 1.03595                                     | 11.40883 | 1.685086 | 0.09983  | 0.146418  | -4.97636 | 0.258917              | 0.773182 | 0.927796  | -0.19                  | 0.640592 | 0.805315  | -0.27738                | 0.455951 | 0.661466  | -0.46739                   | 0.276592 | 0.769782  |
| Proteobacteria                                         | Alcaligenaceae       | Sutterella sp.                                    | -4.76145                                    | 3.724457 | -5.40729 | 3.29E-06 | 2.41E-05  | 4.384576 | 6.037082              | 0.005144 | 0.025147  | -0.14185               | 0.821856 | 0.900486  | 0.399403                | 0.496993 | 0.683366  | 0.257554                   | 0.698802 | 0.946865  |
| Proteobacteria                                         | Desulfobivirionaceae | Bilophila sp.                                     | -5.01071                                    | 3.004966 | -4.90658 | 1.62E-05 | 7.15E-05  | 2.934928 | 1.700108              | 0.195712 | 0.374406  | 0.224942               | 0.744822 | 0.870654  | 0.443624                | 0.466033 | 0.661466  | 0.668566                   | 0.340779 | 0.789172  |
| Proteobacteria                                         | Desulfobivirionaceae | Desulfobivirio C21_c20                            | -0.14262                                    | 1.158877 | -0.133   | 0.894863 | 0.902033  | -5.93876 | 13.44816              | 3.48E-05 | 0.001533  | -1.5745                | 0.041    | 0.325589  | 1.689745                | 0.013245 | 0.083257  | 0.115242                   | 0.878289 | 0.946865  |
